# Supplementary material for: Daridorexant for the treatment of insomnia disorder: A systematic review and meta-analysis of randomized controlled trials
Source: PubMed Central journal article supplement — Medicine (Baltimore). 2023 Feb 17;102(7):e32754. doi: 10.1097/MD.0000000000032754 (PMC9936001; doi:10.1097/md.0000000000032754), 2023-02-17
Supplement: medi-102-e32754-s001.pdf [file medi-102-e32754-s001.pdf]

sTable1. Efficacy of different dosage of daridorexant

|                                 | <b>Daridorexant</b> |             |              |              |              |
|---------------------------------|---------------------|-------------|--------------|--------------|--------------|
| <b>Mean (n)</b>                 | <b>Placebo</b>      | <b>5 mg</b> | <b>10 mg</b> | <b>25 mg</b> | <b>50 mg</b> |
| <b>TST, min</b>                 |                     |             |              |              |              |
| Change at days 1 and 2          | 41.3(114)           | 53.3(116)   | 68.0(112)    | 78.2(115)    | 92.5(117)    |
| Change at month 1               | 34.2(678)           | 53.9(60)    | 43.8(365)    | 51.5(679)    | 62.0(371)    |
| Change at month 3               | 37.3(618)           | NA          | 37.3(307)    | 45.7(619)    | 61.2(310)    |
| <b>ISI</b>                      |                     |             |              |              |              |
| Change at month 1               | -3.8(678)           | -7.4(60)    | -5.2(365)    | -4.9(679)    | -5.6(371)    |
| Change at month 3               | -5.4(618)           | NA          | -7.0(307)    | -6.5(619)    | -7.4(310)    |
| <b>Daytime alertness - mm</b>   |                     |             |              |              |              |
| Change at days 1 and 2          | 14.2(54)            | 9.5(56)     | 17.1(54)     | 17.2(55)     | 13.2(56)     |
| Change at month 1               | 7.8(678)            | 15.1(60)    | 10.6(365)    | 9.5(679)     | 11.5(371)    |
| Change at month 3               | 12.3(618)           | NA          | 14.4(307)    | 15.4(619)    | 16.2(310)    |
| <b>Morning sleepiness - mm</b>  |                     |             |              |              |              |
| Change at days 1 and 2          | 9.6(54)             | 8.3(56)     | 14.6(54)     | 14.4(55)     | 13.8(56)     |
| Change at month 1               | 6.9(675)            | 14.7(60)    | 10.1(364)    | 9.7(678)     | 11.2(369)    |
| Change at month 3               | 11.5(615)           | NA          | 13.5(306)    | 14.9(618)    | 15.3(308)    |
| <b>Ability to function - mm</b> |                     |             |              |              |              |
| Change at days 1 and 2          | 12.1(54)            | 11.1(56)    | 15.2(54)     | 17.6(55)     | 13.4(56)     |
| Change at month 1               | 7.4(678)            | 15.5(60)    | 10.4(365)    | 8.9(679)     | 12.9(371)    |
| Change at month 3               | 11.8(618)           | NA          | 13.4 (307)   | 14.3(619)    | 17.3(310)    |

**sTable2. Safety of different dosage of daridorexant**

| n (%)                                                       | Placebo<br>(n = 733) | Daridorexant      |                    |                    |                    |
|-------------------------------------------------------------|----------------------|-------------------|--------------------|--------------------|--------------------|
|                                                             |                      | 5 mg<br>(n = 114) | 10 mg<br>(n = 418) | 25 mg<br>(n = 733) | 50 mg<br>(n = 425) |
| Participants with adverse event* ( $\geq 2\%$ in any group) |                      |                   |                    |                    |                    |
| Nasopharyngitis                                             | 40<br>(0.05)         | 2 (0.02)          | 35<br>(0.08)       | 34<br>(0.05)       | 24<br>(0.06)       |
| Headache                                                    | 25<br>(0.03)         | 8 (0.07)          | 17<br>(0.04)       | 43<br>(0.06)       | 25<br>(0.06)       |
| Fatigue                                                     | 7 (0.01)             | 1 (0.02)          | 3 (0.01)           | 21<br>(0.03)       | 11<br>(0.03)       |
| Participants with $\geq 1$ serious adverse event            | 11<br>(0.02)         | 0 (0)             | 5 (0.01)           | 5 (0.01)           | 4 (0.01)           |
