# Supplementary material for: Daridorexant for the treatment of insomnia disorder: A systematic review and meta-analysis of randomized controlled trials
Source: PubMed Central journal article supplement — Medicine (Baltimore). 2023 Feb 17;102(7):e32754. doi: 10.1097/MD.0000000000032754 (PMC9936001; doi:10.1097/md.0000000000032754), 2023-02-17
Supplement: medi-102-e32754-s002.pdf [file medi-102-e32754-s002.pdf]

(A) WASO at month 1

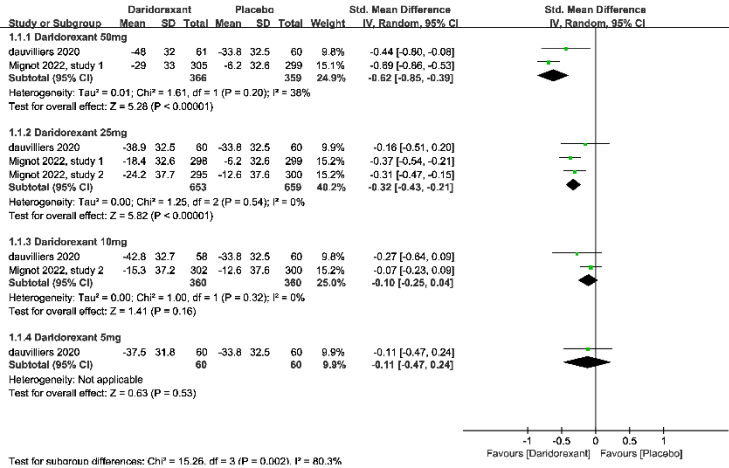

(B) LPS at month 1

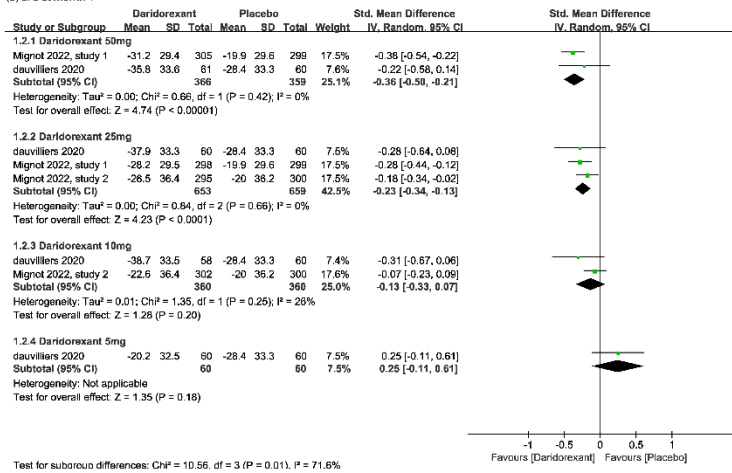

(C) STST at month 1

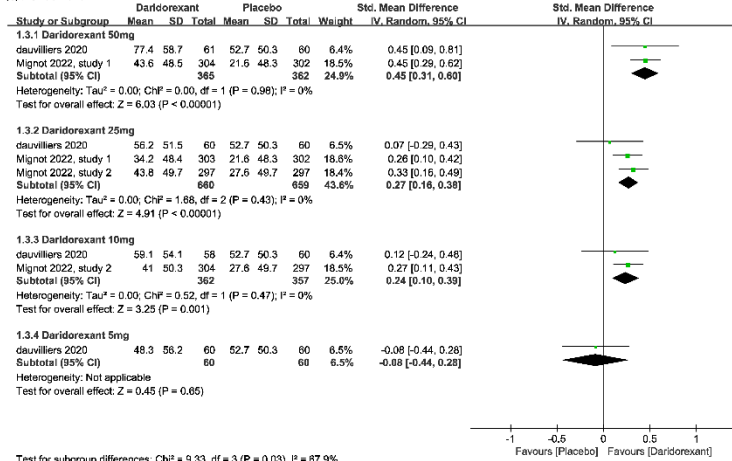

(D) HDSIQ sleepiness domain score at month 1

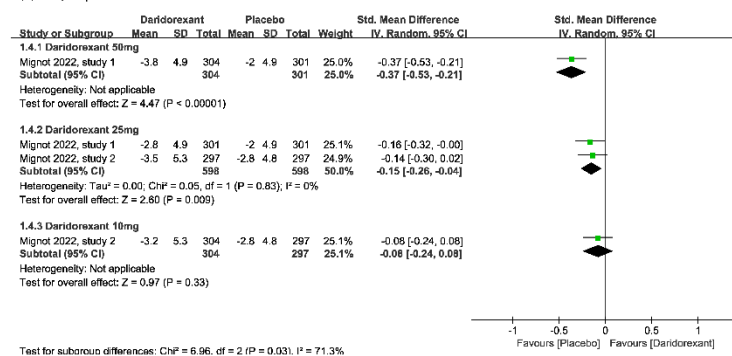

**sFig1. WASO, LPS, sTST and IDSIQ sleepiness domain score at Month 1**
