# Supplementary figures and images for: Daridorexant for the treatment of insomnia disorder: A systematic review and meta-analysis of randomized controlled trials
Source: PubMed Central journal article supplement — Medicine (Baltimore). 2023 Feb 17;102(7):e32754. doi: 10.1097/MD.0000000000032754 (PMC9936001; doi:10.1097/md.0000000000032754), 2023-02-17

(A) WASO at days 1 and 2

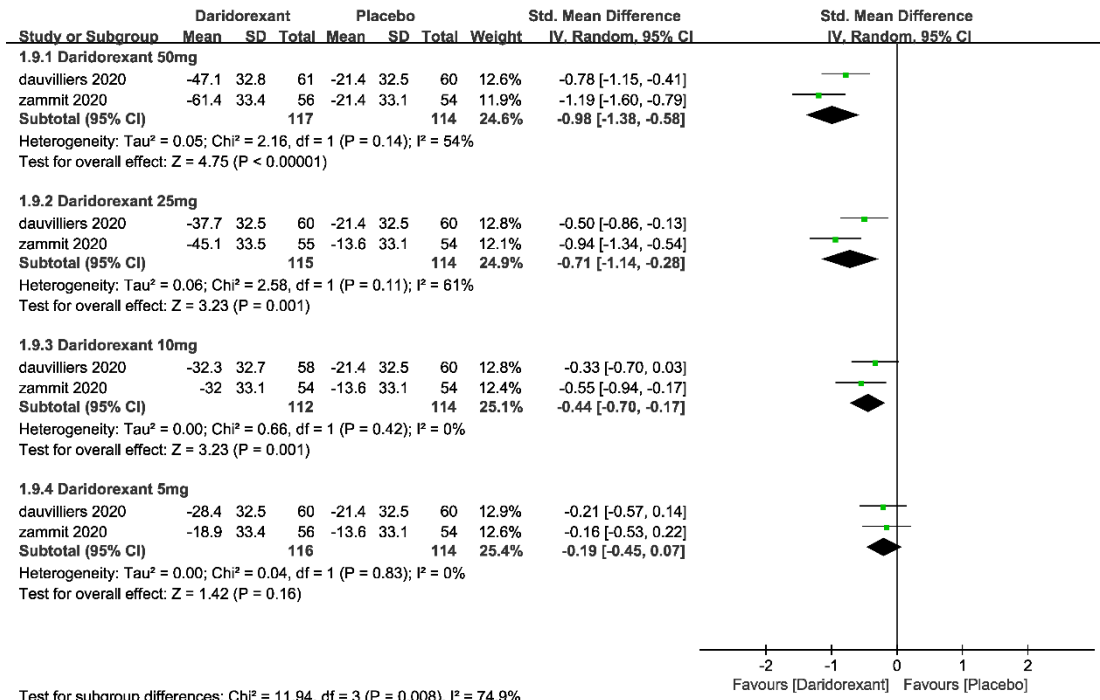

(B) LPS at days 1 and 2

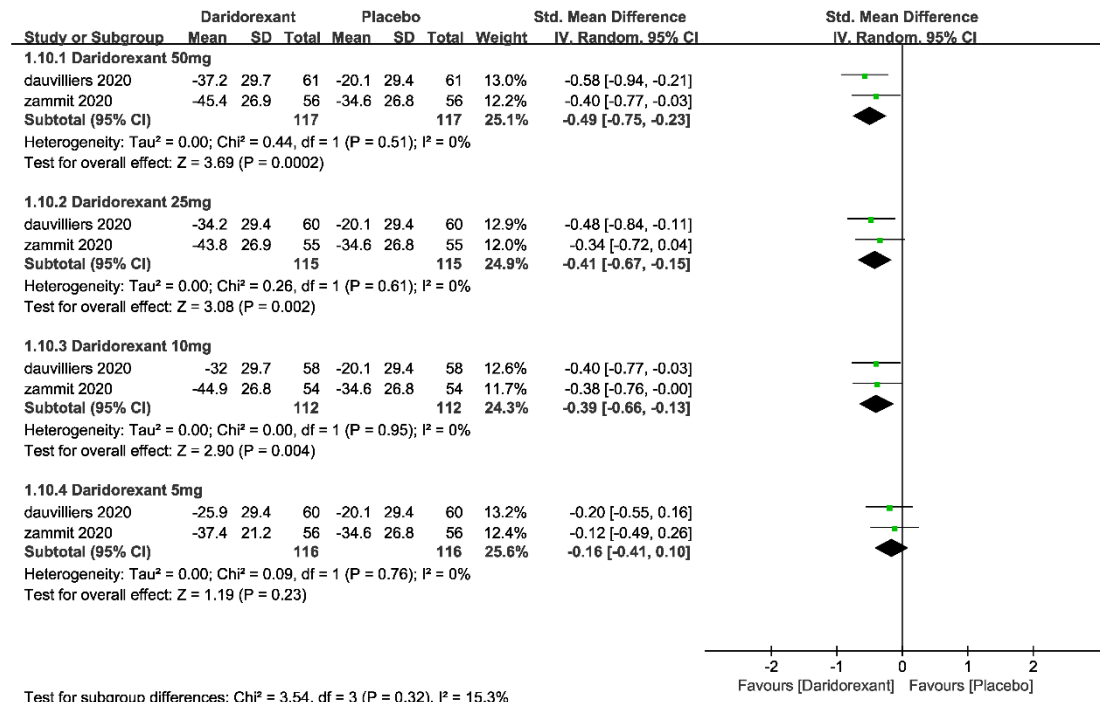

**sFig2. WASO and LPS at Days 1 and 2**

Supplement: medi-102-e32754-s003.pdf [file medi-102-e32754-s003.pdf]

(A) age  $\geq$  65 years

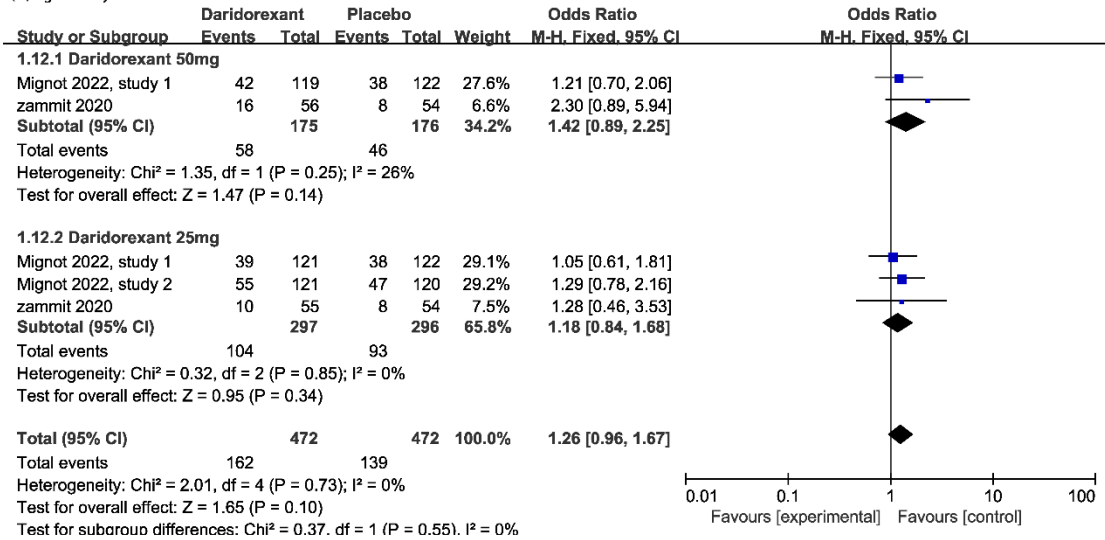

(B) age  $\leq$  64 years

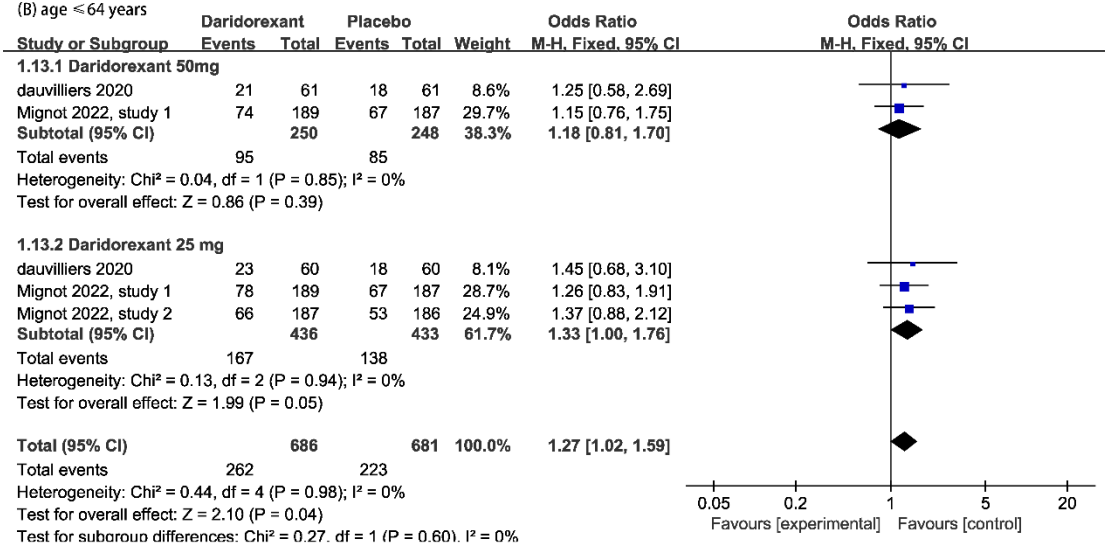

sFig.3 Subgroup of safety analysis (age  $\geq$  65 years and age  $\leq$  64 years)

Supplement: medi-102-e32754-s004.pdf [file medi-102-e32754-s004.pdf]
